# Supplementary material for: Plasma Total Antioxidant Capacity and Carbonylated Proteins Are Increased in Pregnant Women with Severe COVID-19
Source: MDPI journal article supplement (doi:10.3390/v14040723), 2022-03-30
Supplement: s1 [file s1]

**Table S1.** Effect of maternal characteristics and severity COVID-19 on oxidative stress markers.

|                                   | <b>B</b> | <b>95 CI%</b>   | <b><i>p</i>-value</b> | <b>R2/(R2 adjusted)</b> |
|-----------------------------------|----------|-----------------|-----------------------|-------------------------|
| <b>Malondialdehyde</b>            |          |                 |                       |                         |
| Constant                          | 36.7.    | 14.9 to 58.5    | 0.001                 |                         |
| Maternal age                      | -0.032   | -0.434 to 0.370 | 0.874                 | 0.0338 (-0.03529)       |
| GA at diagnosis                   | -0.170   | -0.528 to 0.188 | 0.344                 |                         |
| pBMI                              | -0.141   | -0.527 to 0.245 | 0.468                 |                         |
| Severe COVID-19                   | -2.17    | -6.60 to 2.26   | 0.330                 |                         |
| <b>Carbonylated proteins</b>      |          |                 |                       |                         |
| Constant                          | 12604    | 5077 to 20132   | 0.001                 |                         |
| Maternal age                      | -160     | -299 to -21.3   | 0.025                 | 0.1932 (0.1311)         |
| GA at diagnosis                   | -1.38    | -125 to 122     | 0.982                 |                         |
| pBMI                              | -65.5    | -199 to 67.8    | 0.330                 |                         |
| Severe COVID-19                   | 2032     | 504 to 3561     | 0.010                 |                         |
| <b>Total antioxidant capacity</b> |          |                 |                       |                         |
| Constant                          | 43.8     | -4.24 to 91.8   | 0.075                 |                         |
| Maternal age                      | 0.052    | -0.833 to 0.938 | 0.906                 | 0.2240 (0.1643)         |
| GA at diagnosis                   | 0.071    | -0.714 to 0.861 | 0.852                 |                         |
| pBMI                              | -0.213   | -1.063 to 0.638 | 0.618                 |                         |
| Severe COVID-19                   | 18.1     | 8.26 to 27.8    | 0.001                 |                         |

Models included 54 COVID-19 pregnant women; non-severe COVID-19 ( $n = 40$ ) and severe COVID-19 ( $n = 17$ ); GA: Gestational age; pBMI: Pregestational body mass index.
